1       **Competitive advantage of oral streptococci for colonization of the**  
2       **middle ear mucosa**

3                               Kristin M. Jacob and Gemma Reguera<sup>#</sup>

4  
5       *Department of Microbiology and Molecular Genetics, Michigan State University, East*

6                               *Lansing, Michigan, USA*

7

8       **#Corresponding Author:**

9       Gemma Reguera

10      567 Wilson Rd., Rm. 6190

11      Biomedical & Physical Sciences building

12      East Lansing, MI 48824

13      Tel.: (517)884-5401

14      e-mail: [reguera@msu.edu](mailto:reguera@msu.edu).

15

16      **Running title:** otic streptococci

17

18      **Keywords:** middle ear, Eustachian tube, biofilms, otic microbiome, oral cavity,

19      otopathogen, mucin

20

## 21 **Abstract**

22 The intermittent aeration of the middle ear seeds its mucosa with saliva aerosols and selects for  
23 a distinct community of commensals adapted to the otic microenvironment. We gained insights  
24 into the selective forces that enrich for specific groups of oral migrants in the middle ear mucosa  
25 by investigating the phylogeny and physiology of 19 strains enriched (*Streptococcus*) or  
26 transiently present (*Staphylococcus*, *Neisseria* and actinobacterial *Micrococcus* and  
27 *Corynebacterium*) in otic secretions. Phylogenetic analyses of full length 16S rRNA sequences  
28 resolved close relationships between the streptococcal strains and oral commensals as well as  
29 between the transient migrants and known nasal and oral species. Physiological functions that  
30 facilitate mucosal colonization (swarming motility, surfactant production) and nutrition (mucin  
31 and protein degradation) were widespread in all the otic cultivars, as was the ability of most of  
32 the isolates to grow both aerobically and anaerobically. However, streptococci stood out for their  
33 enhanced biofilm-forming abilities under oxic and anoxic conditions and for their efficient  
34 fermentation of mucosal substrates into lactate, a key metabolic intermediate in the otic trophic  
35 webs. Additionally, the otic streptococci inhibited the growth of common otopathogens, an  
36 antagonistic interaction that could exclude competitors and protect the middle ear mucosa from  
37 infections by transient pathobionts. These adaptive traits allow streptococcal migrants to  
38 colonize the otic mucosa and grow microcolonies with syntrophic anaerobic partners,  
39 establishing trophic webs with other commensals similar to those formed by the oral ancestors  
40 in buccal biofilms.

41

## 42 **Importance**

43 The identification of a diverse microbiome in otic secretions from healthy young adults  
44 challenged the entrenched dogma of middle ear sterility and underscored previously unknown  
45 roles for oral commensals in the seeding of otic biofilms. By comparing the physiology of novel

46 lineages of streptococci and transient (peri)oral species isolated from otic secretions, we  
47 identified adaptive behaviors that allow specific oral streptococcal species to successfully  
48 colonize the mucosa of the middle ear. We also describe antagonistic properties of the otic  
49 streptococci that help them outcompete transient nasal and oral migrants, including known  
50 otopathogens. This knowledge is important to predictively understand the functionality of the otic  
51 communities, their interactions with the host mucosa and the outcome of infections.

52

## 53 Introduction

54 The oral cavity provides a heterogenous landscape of surfaces and microenvironments (teeth,  
55 gingiva, tongue, cheek, hard and soft palate, etc.) for the growth of microbial communities (1).  
56 The availability of dietary substrates supports the growth and diversification of the oral  
57 inhabitants, making these communities some of the richest and most diverse in the human body  
58 (2). Many of these microbes readily disperse with saliva into perioral regions (1) and, from there,  
59 to other parts of the digestive tract (3). Dispersal is also enhanced by the spread of saliva  
60 aerosols from the oropharynx (back of the throat) into the respiratory tract (3). Indeed, the air  
61 inhaled through the nasal passages or the mouth disperses the saliva aerosols from the  
62 oropharynx into the esophagus and trachea and, from there, to the lower parts of the  
63 aerodigestive tract. Similarly, air exhaled from the lungs disperses saliva aerosols from the  
64 oropharynx into the nasal cavity. The opening of the extended tube of the middle ear (the  
65 Eustachian tube, Fig. 1) into the distal part of the nasopharynx also promotes the entry of saliva  
66 aerosols with exhaled air (4). The Eustachian tube is passively collapsed at rest to sound proof  
67 the tympanic cavity and minimize microbial entry, yet it opens when we swallow to draw in air  
68 from the lower airways and ventilate the tympanic cavity (Fig. 1) (4). The periodic aperture and  
69 collapse of the Eustachian tube promotes the intermittent aeration of the tympanic cavity,  
70 relieves negative pressure across the eardrum and secretes into the nasopharynx excess  
71 mucus and fluids (4). It also introduces saliva aerosols into the middle ear and establishes  
72 fluctuating redox conditions optimal for the growth of strict and facultative anaerobes (5).  
73 Consistent with this, otic secretions collected at the orifice of the Eustachian tube are enriched  
74 in obligate or facultatively anaerobic genera within the phyla Bacteroidetes (*Prevotella* and  
75 *Alloprevotella*), Fusobacteria (*Fusobacterium* and *Leptotrichia*) and Firmicutes (*Veillonella* and  
76 *Streptococcus*) (5). The co-enrichment in otic secretions of Bacteroidetes, streptococci and  
77 *Veillonella* spp. suggests that they grow syntrophically as in oral biofilms (5). In this model (Fig.

78 1), Bacteroidetes could degrade mucin glycoproteins and other mucosal proteins into substrates  
79 (sugars and peptides) that oral streptococci can ferment under both aerobic and anaerobic  
80 conditions (6). This metabolic capacity could produce lactate for *Veillonella* fermentation into  
81 propionate, acetate, CO<sub>2</sub> and H<sub>2</sub>, as described in oral biofilms (7, 8). The lactate dependency of  
82 *Veillonella* spp. could also support metabolic interactions with Bacteroidetes partners that  
83 ferment simple sugars into lactate (9). The co-aggregative properties of oral streptococci during  
84 the formation of the dental plaque (2, 10) could facilitate the formation of microcolonies in the  
85 middle ear as well and promote metabolic exchange with the strictly anaerobic Bacteroidetes  
86 and *Veillonella* partners (5). Through their collective metabolism (Fig. 1), otic microcolonies of  
87 Bacteroidetes, streptococci and *Veillonella* could degrade and ferment host-derived mucins and  
88 proteins into short chain fatty acids such as propionate and acetate, potentially contributing to  
89 mucosal health as in other body sites (11).

90

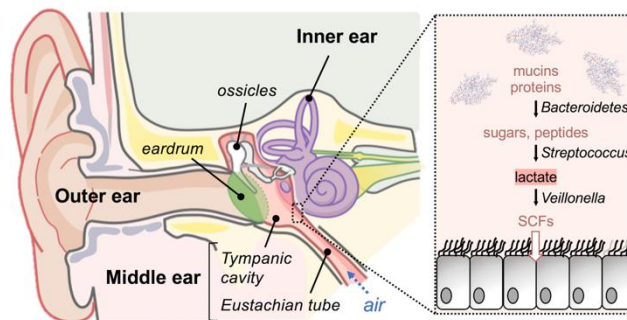

91 **Fig 1: Illustration of the human ear anatomy (left) and trophic webs within bacterial**  
92 **microcolonies in the middle ear mucosa (right).** The human ear is divided in three  
93 compartments (outer, middle and inner). The eardrum separates the outer ear canal from the  
94 tympanic cavity of the middle ear, which extends as a tube (Eustachian tube) into the  
95 nasopharynx to draw in air and drain otic secretions. The microbiome sequenced from otic  
96 secretions of healthy young adults (5) supports the establishment of an otic trophic web (inset)  
97 for the degradation of host mucins and proteins by Bacteroidetes into substrates (sugars and  
98 peptides) that *Streptococcus* and *Veillonella* cooperatively ferment into short chain fatty acids  
99 (SCFs) via lactate.

100 The presence of bacterial microcolonies in biopsy specimens of the mucosal lining of the  
101 tympanic cavity (12, 13) suggests that some oral migrants penetrated the mucus layer, attached

102 to the underlying epithelium and formed biofilms. Swarming motility could have allowed these  
103 successful colonizers to move through the viscous mucus medium and evade immune attack  
104 (14). Crossing the mucus barrier is also important to avoid clearance, which in the middle ear is  
105 mediated by the movement of cilia (mucociliary clearance) and the pumping force exerted by  
106 muscles contracting and relaxing around the Eustachian tube when swallowing (muscular  
107 clearance) (15, 16). Once they reach the mucosal epithelium, successful colonizers attach to it  
108 and grow as microcolonies on the mucosal surface to avoid clearance (17). This points at  
109 biofilm formation as a critical selective factor for growth and reproduction in the otic mucosa.  
110 Biofilms are also important to create anoxic microenvironments for anaerobic partners to grow  
111 despite the periodic redox fluctuations experienced in the middle ear. Because the aperture of  
112 the Eustachian tube is triggered by swallowing, air only enters the middle ear every minute  
113 during the wake hours or every five minutes during sleep (4). Facultative anaerobes such as  
114 *Streptococcus* have a growth advantage under these conditions, and could co-aggregate as in  
115 oral biofilms (18) to establish anaerobic niches for their anaerobic syntrophic partners (e.g.,  
116 *Bacteroidetes* and *Veillonella* species). Nutrient foraging is also important for the establishment  
117 of biofilms in the middle ear mucosa. In the absence of dietary nutrients, the otic communities  
118 are more likely to sustain their trophic webs with host-derived nutrients such as proteins and  
119 mucin glycoproteins secreted to the mucosa (19). Motility in the viscous environment of the  
120 mucosa could facilitate nutrient foraging (20) while the ability of the bacteria to secrete hydrolytic  
121 enzymes (mucinases and proteases) could allow them to break down the mucin glycoproteins  
122 and mucosal proteins into sugars and amino acids (21).

123 Phylogenetic analyses of cultivars recovered from otic secretions also support an oral  
124 ancestry of the middle ear communities (5). These cultivars include streptococcal strains closely  
125 related yet phylogenetically distinct from oral ancestors, consistent with the diversification of oral  
126 taxa into lineages better suited for growth and reproduction in the middle ear mucosa (5).  
127 Cultivars recovered from otic secretions also include nasal and oral species from genera

128 (*Staphylococcus*, *Neisseria* and actinobacterial *Micrococcus* and *Corynebacterium*) that  
129 transiently disperse through the oral and perioral regions (5). Streptococcal and staphylococcal  
130 species are, for example, among the most prominent members in the oral and nasal  
131 microbiomes, respectively (3, 22). Both groups disperse in the aerodigestive tract and are  
132 predicted to enter the middle ear during the intermittent cycles of aperture of the Eustachian  
133 tube. Yet, while streptococci are one of the most abundant groups in otic secretions,  
134 staphylococcal-like sequences are seldom detected (5). This suggests that streptococcal  
135 migrants have a competitive advantage over the transient staphylococcal species during the  
136 colonization of the middle ear mucosa. To test this, we sequenced and partially assembled the  
137 genomes of 19 cultivars representing otic commensals (*Streptococcus*) and transient genera  
138 (*Staphylococcus*, *Neisseria*, *Micrococcus* and *Corynebacterium*) (5) and used the full length 16S  
139 rRNA sequences to identify their closest relatives. We then screened the cultivars for adaptive  
140 traits predicted to be important for mucosal colonization (swarming, surfactant production,  
141 biofilm formation) and for growth under conditions (redox, nutritional, etc.) relevant to the middle  
142 ear microenvironment. Our study revealed similar adaptive traits for mucosal growth in most of  
143 the isolates but aggregative and metabolic properties of streptococci that could facilitate their  
144 attachment to the mucosal epithelium and syntrophic growth within microcolonies. These same  
145 properties are also present in their closest oral ancestors, with whom they share the ability to  
146 establish trophic webs with anaerobes and antagonize transient members from the oral and  
147 perioral regions. These findings provide novel insights into the adaptive responses that sustain  
148 the growth and functionality of otic communities as well as interactions with the host mucosa  
149 and transient migrants that influence the outcome of infections.

## 150 **Results**

### 151 **Phylogenetic analysis supports the oral ancestry of otic streptococcal commensals**

152 Cultivars recovered from otic secretions collected from healthy young adults include genera  
153 enriched in the otic secretions (*Streptococcus*) as well as transient or lowly abundant groups  
154 (*Staphylococcus*, *Neisseria*, and the actinobacterial genera *Micrococcus* and *Corynebacterium*)  
155 (5). Phylogenetic analysis of partial 16S rDNA sequences amplified from these isolates revealed  
156 close relationships with oral (oropharyngeal and buccal) strains isolated from the same  
157 individuals but lacked the resolution needed for species-level demarcation (5). Thus, we  
158 sequenced and partially assembled the genomes of 19 otic cultivars to retrieve full-length 16S  
159 rDNA sequences for each of the isolates. A species sequence identity cutoff of >98.7% (23)  
160 matched each otic isolate to more than one species within each genus (Table 1 shows the top  
161 identity hit for each strain). Phylogenetic inference methods resolved, however, close  
162 evolutionary ties with specific species that reside or are transiently isolated from the oral cavity  
163 (Fig. 2).



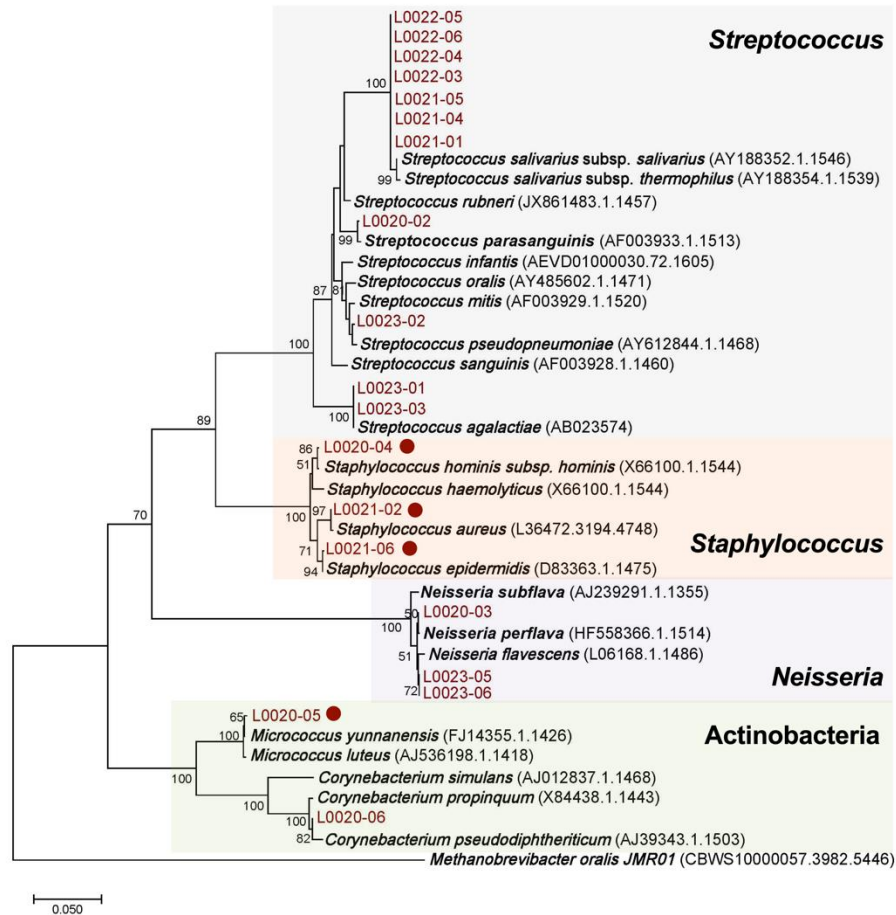

164  
165  
166  
167  
168  
169  
170

**Fig. 2: 16S rRNA gene phylogeny of otic cultivars.** Maximum-likelihood tree constructed with full-length 16S rRNA sequences from the otic isolates and the closest reference strains (accession number in parentheses). The scale bar indicates 5% sequence divergence filtered to a conservation threshold above 79% using the Living Tree Database (24, 25). Bootstrap probabilities by 1000 replicates at or above 50% are denoted by numbers at each node. The circles identify catalase-positive isolates.

171 The nearest neighbor to most of the *Streptococcus* sequences (seven of them) was  
172 *Streptococcus salivarius* (subspecies *salivarius* and *thermophilus*) (Fig. 2). Genomic divergence  
173 (size and gene content) is high for species and subspecies within the *Salivarius* group (26). As a  
174 result, strains of *S. salivarius* can have very different metabolic and physiological characteristics  
175 or even habitat/host preferences despite high 16S rRNA sequence identity (26, 27). Thus, the  
176 separate clustering of the 7 otic strains of *S. salivarius* could reflect substantial divergence of  
177 the otic subclade from an oral ancestor. The rest of the otic streptococcal sequences clustered  
178 separately from close oral relatives within the *Mitis* (L0020-02 and *Streptococcus*

179 *parasanguinis*), Viridans (L0023-02 and *Streptococcus pseudoneumoniae*) and the Lancefield's  
180 group B streptococcus or GBS (L0023-01 and L0023-03 and *Streptococcus agalactiae*) groups  
181 (27, 28) (Fig. 2). Hence, 16S rRNA phylogeny supports the oral ancestry of the streptococcal  
182 cultivars but also reveals a level of divergence that is consistent with the ecological  
183 diversification of niche-adapted otic lineages proposed in earlier studies (5).

184 The 16S rRNA sequence identity of the non-streptococcal strains also produced more  
185 than one match to species of *Staphylococcus*, *Neisseria*, *Micrococcus* and *Corynebacterium*  
186 (Table 1). Consistent with the classification of three of the isolates as *Staphylococcus* spp., all  
187 were catalase negative, and all branched within subclades of staphylococcal 16S rRNA  
188 sequences (Fig. 2). The closest neighbors to the three otic staphylococci were species  
189 (*Staphylococcus hominis*, *Staphylococcus aureus*, and *Staphylococcus epidermidis*) that are  
190 highly represented in the nasal passages (22). Their nasal abundance facilitates their dispersal  
191 in the contiguous oral cavity (29) and their transient detection in oral and perioral regions (29,  
192 30), including otic secretions (5). Transience also explains the recovery of *Neisseria* strains  
193 closely related to *Neisseria perflava*, *Neisseria subflava* and *Neisseria flavescens* (Fig. 2), which  
194 are species that colonize the mucosa of the oropharynx (31, 32) and disperse via saliva  
195 aerosols (33). Neutral community models predict, however, a similar distribution of *Neisseria*  
196 species in otic secretions compared to oral and perioral source communities, supporting the  
197 idea that they are transient migrants (5). The otic isolates also included two actinobacterial  
198 *Micrococcus* and *Corynebacterium* strains (Table 1). The *Micrococcus* isolate was catalase-  
199 positive, a general phenotypic trait of the genus (34), and branched closely to *Micrococcus*  
200 *yunnanensis* (Fig. 2). This is a soil *Micrococcus* species (35) that, like other environmental  
201 micrococci, transiently disperses with air in the human aerodigestive tract (36). The second  
202 actinobacterial isolate was closely related to *Corynebacterium pseudodiphthericum* (Fig. 2).  
203 *Corynebacterium* commensals are prominent members of the nasal microbiomes and  
204 antagonists of nasal pathobionts, including some of the most important otopathogens (37). Their

205 abundance in the nasal microflora explains their detection in oral and perioral regions (38).  
206 However, actinobacteria only account for ~1% of the operational taxonomic units (OTUs) in otic  
207 secretions, suggesting they are negatively selected for growth and reproduction in the middle  
208 ear mucosa (5).

### 209 **Surfactant-mediated swarming motility is widespread among the otic cultivars**

210 Successful colonization of any respiratory mucosa requires bacterial migrants to move rapidly  
211 across the mucus layer in order to avoid immune attack and clearance (17). Some flagellated  
212 bacteria can reach the underlying epithelial lining by rapidly swarming in groups through the  
213 viscous mucoid layer, a process that is stimulated by the lubricating effect of mucin  
214 glycoproteins (20). Swarming behaviors can be identified in laboratory plate assays that test the  
215 expansion of microcolonies on a soft agar (0.4-0.5%) surface (20). Thus, we tested the ability of  
216 the 19 otic isolates to swarm on the surface of 0.5% tryptone soy agar (TSA) plates in reference  
217 to the robust swarmer *Pseudomonas aeruginosa* PA01 (39). Figure 3A shows the progression  
218 of the swarming expansion for each strain over time, which we calculated as the average  
219 expansion zone in triplicate plate assays (Table 2). Although *P. aeruginosa* showed large zones  
220 of swarming expansion already at 18 h, we only detected swarming activity in the otic isolates  
221 after 42 or 62 h of colony growth (Fig. 3A). Lag phases are not unusual prior to swarming on  
222 agar plates for cells that must reprogram their physiology to grow on the surface of the agar-  
223 solidified medium (20). Consistent with this, the strains that grew faster on the semisolid TSA  
224 plates (three staphylococcal and the two actinobacterial isolates) produced visible zones of  
225 swarming expansion at 42 h, while the slowest growers (*N. perflava* (L0023-05 and L0023-06)  
226 required 62 h of incubation (Table 2). Notably, most of the streptococci grew well in tryptone soy  
227 broth (TSB), yet they aggregated strongly when growing on the surface of soft-agar plates (Fig.  
228 3B). These aggregative strains also had delayed swarming phenotypes on 0.5% TSA plates  
229 (Table 2) but it was possible to rescue the swarming delay on plates with lower (0.4%) agar

230 concentration (Fig. 3B). For example, the streptococcal strain L0022-03 did not swarm on 0.5%  
231 TSA plates until after 62 h (Table 2) but expanded 0.28 cm away from the edge of the  
232 macrocolony after 42 h of growth on 0.4% TSA plates (Fig. 3B). Temperate swimmers often  
233 require a softer agar surface to overcome frictionally forces between the cell and the surface  
234 (20). This is because lowering the agar concentration facilitates water movement to the surface  
235 and immerses the cells in a layer of liquid that stimulates swarming (20).

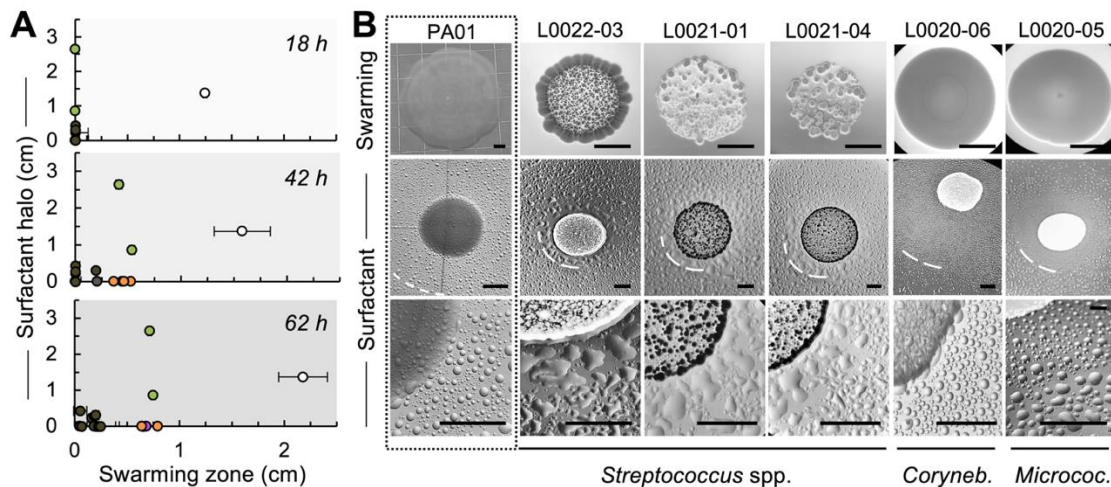

236  
237 **Fig. 3. Swarming motility and surfactant production by otic cultivars in reference to**  
238 ***Pseudomonas aeruginosa* PA01. (A)** Average surfactant production (halo of mineral oil  
239 dispersal around 24h colonies grown on 1.5% TSA) and size of swarming expansion (0.5% TSA  
240 plates at 18, 42 and 62 h) measured in triplicate replicates of the otic isolates (*Streptococcus* in  
241 gray; *Staphylococcus* in orange; *Neisseria* in purple; and actinobacterial strains of  
242 *Corynebacterium* and *Micrococcus* in green) and the positive control (*P. aeruginosa* PA01 in  
243 white). **(B)** Representative images of swarming (0.4% TSA, 42 h) and surfactant (1.5% TSA, 24  
244 h) plate assays for *P. aeruginosa* PA01 (positive control, boxed) and otic strains of  
245 *Streptococcus*, *Corynebacterium* and *Micrococcus* (scale bars, 0.5 cm). The edge of the  
246 surfactant halo is highlighted with a dashed white line.

247 The need for some bacteria to express cellular components (flagella, exopolysaccharide,  
248 surfactants, etc.) mediating swarming on semisolid agar can also delay the appearance of  
249 expansion zones (20). Surfactants are particularly important to reduce frictional resistance  
250 between the surface of swarming cells and the underlying substratum (20). Furthermore, their  
251 concentration and diffusion in soft-agar medium controls the extent of swarming expansion (40).  
252 Hence, we also screened the cultivars for surfactant production. To do this, we spot-plated each

253 isolate on hard agar (1.5%) TSA plates and airbrushed a fine mist of mineral oil droplets onto  
254 colonies grown at 37°C for 24 h. This atomized oil assay instantaneously reveals halos of oil  
255 droplet dispersal around surfactant-producing strains and allows for semiquantitative estimation  
256 of the levels of surfactant production, even when present at concentrations too low to be  
257 detected by traditional methods such as the water drop collapse assay (40). We detected  
258 haloes of oil dispersal around 9 of the isolates at 24 h (Table 2). Furthermore, we observed  
259 positive correlations between surfactant production and swarming ability on 0.5% TSA for most  
260 strains (Fig. 3A). For example, the actinobacterial isolates, which were the most robust  
261 swarmers, produced the highest levels of surfactant (Table 2). By contrast, temperate swarmers  
262 such as the streptococcal isolates produced low or undetectable levels of surfactants under the  
263 experimental conditions. As an exception, the staphylococcal isolates swarmed robustly on the  
264 soft agar plates (Fig. 3) although they did not produce detectable halos of mineral oil dispersion  
265 (Table 2). Staphylococcal cells lack flagellar locomotion and thus do not have canonical (i.e.,  
266 flagella-driven) swarming behaviors. These bacteria can however passively ‘spread’ on soft  
267 agar surfaces (41) through the coordinated synthesis of lubricating peptides known as phenol-  
268 soluble modulins (PSMs) (42). PSM surfactants accumulate very close to the colony edge (43).  
269 Hence, they are unlikely to produce a halo of oil dispersal in the atomized assay used for  
270 testing.

### 271 **Redox and nutritional advantage of otic streptococci in the middle ear mucosa**

272 Successful colonizers of the middle ear mucosa face sharp redox fluctuations due to the brief  
273 (400 milliseconds) and infrequent (approximately every minute when we swallow) aperture of  
274 the Eustachian tube (4). The enrichment in otic secretions of anaerobic metabolisms further  
275 supports the idea that conditions of oxygen limitation prevail in the middle ear (5). For this  
276 reason, we tested the ability of the otic cultivars to grow under aerobic or anaerobic conditions  
277 (Fig. 4A). All the isolates grew well in oxic and anoxic TSB medium, except for two *Neisseria*

278 strains (L0023-05 and L0023-06) that grew slowly in the oxic broth. These two strains also  
279 flocculated extensively in oxic medium, an aggregative behavior exhibited by microaerophiles in  
280 response to elevated (and toxic) oxygen concentrations (44). By contrast, the streptococcal and  
281 staphylococcal strains had similar growth rates aerobically and anaerobically ( $0.56\pm 0.23$  and  
282  $0.49\pm 0.12$  doubling times, respectively), suggestive of a competitive advantage for growth and  
283 reproduction under sharp redox fluctuations. The actinobacterial strains also grew aerobically  
284 and anaerobically but differed in their redox preference. Both isolates doubled every  $\sim 0.5$  h  
285 under anoxic conditions. However, generation times increased in aerobic cultures of  
286 *Micrococcus* L0020-05 ( $\sim 0.7$  h) whereas *Corynebacterium* L0020-06 grew more rapidly than  
287 any other strain under these conditions (0.15 h average generation time). This aerobic  
288 preference matches well the enrichment of *Corynebacterium* species in the aerated nasal  
289 passages (22) and the reduced abundance of this group in otic secretions (5).

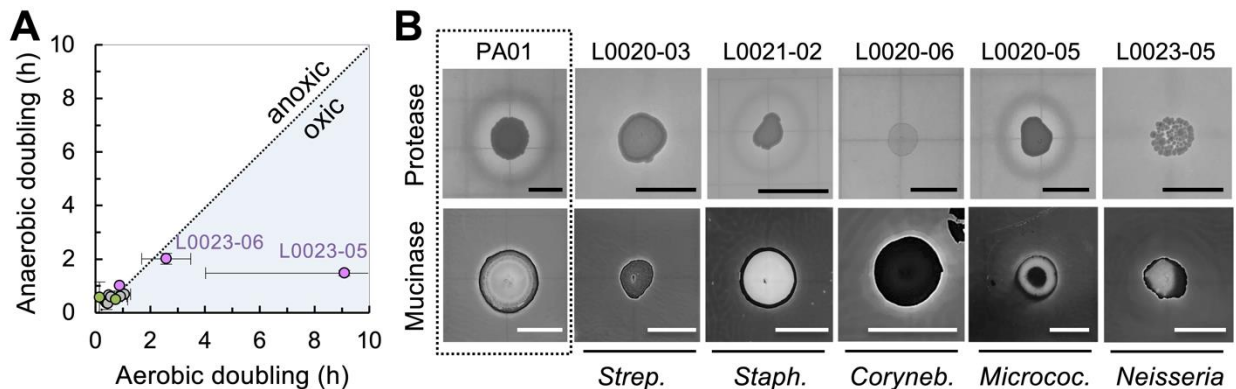

290  
291 **Fig. 4: Growth of otic isolates as a function of oxygen availability and host nutrients**  
292 **(protein and mucin).** (A) Average doubling times of otic isolates growing in triplicate TSB  
293 cultures aerobically or anaerobically at 37°C. Data points are color-coded for *Streptococcus*  
294 (gray), *Staphylococcus* (orange), *Neisseria* (purple) and actinobacterial genera *Micrococcus* and  
295 *Corynebacterium* (green). The flocculating strains of *Neisseria* are labeled. (B) Protease and  
296 mucinase activity (haloes of milk casein or porcine gastric mucin degradation, respectively) of  
297 representative otic isolates and *P. aeruginosa* PA01 (positive control, boxed). The milk casein  
298 plates were photographed without staining after 24 h of incubation at 37°C. The mucin plates  
299 were incubated for 48 h and stained with 0.1% amido black prior to photography. Scale bars,  
300 0.5 cm.

301 In addition to redox fluctuations, bacteria colonizing the otic mucosa must cope with a  
302 scarcity of nutrients. The limited carriage of dietary substrates in saliva aerosols reduces  
303 nutrient availability in the middle ear, exerting selective pressure on colonizers to use host-  
304 derived nutrients such as mucosal proteins and mucin glycoproteins (5). To test this, we  
305 screened the otic isolates for their ability to secrete enzymes (proteases and mucinases)  
306 needed to break down the host nutrients into readily assimilated substrates (amino acids and  
307 sugars). For these experiments, we spot-plated the cultivars onto TSA plates supplemented with  
308 5% lactose-free skim milk (protease assay) or 0.5% porcine gastric mucin (mucinase assay) for  
309 24 h to identify zones of substrate degradation around the colonies. Figure 4B shows typical  
310 results for representative otic strains and the positive control *P aeruginosa* PA01, while Table 3  
311 shows the results (presence or absence of a halo of substrate degradation) in triplicate plate  
312 assays for each strain. Notably, all the isolates were able to degrade mucin to various degrees  
313 after 24 h of incubation at 37°C. Three aggregative strains of *S. salivarius* (L0021-01, L0022-03  
314 and L0022-04) produced only faint mucin clearings after 24 h (+/- in Table 3) but the zone of  
315 degradation became more prominent after extending the incubation period to 48 h. By contrast,  
316 protease activity was only detected in the streptococcal and staphylococcal groups (Table 3).  
317 Extracellular proteases typically have low substrate selectivity and, thus, can cleave a wide  
318 range of substrates (45). Non-selectivity is particularly advantageous in the middle ear mucosa,  
319 as it allows residents to scavenge proteins and the mucin protein backbone as nitrogen sources  
320 (19). In addition to providing a metabolic advantage, proteases facilitate mucosal penetration,  
321 control mucus viscosity, modulate host immune responses, and can prevent the establishment  
322 of competitors (46). Therefore, protease secretion may confer on streptococcal and  
323 staphylococcal migrants a competitive advantage for growth and reproduction in the otic  
324 mucosa.

### 325 **Metabolic advantage of streptococci for syntrophic growth in biofilms**

326 The presence of bacterial microcolonies on the epithelial surface of biopsy specimens collected  
327 from the tympanic cavity of healthy individuals (13) points at biofilm formation as an important  
328 adaptive response for successful colonization of the middle ear mucosa. Based on this, we  
329 investigated the ability of the otic isolates to form biofilms under aerobic and anaerobic  
330 conditions. These assays used crystal violet to stain 24-h biofilms formed at the bottom of the  
331 microtiter plates that we previously used for planktonic growth studies (Fig. 4A). We then  
332 solubilized the biofilm-associated dye to estimate the biofilm biomass from the absorbance of  
333 the solution at 550 nm (Fig. 5A). All but two streptococcal strains (*S. pseudopneumoniae* L0023-  
334 02 and *S. agalactiae* L0023-03) formed robust biofilms under aerobic conditions. Among these  
335 streptococcal biofilm formers, four strains (*S. salivarius* L0021-04 and L0021-05, *S.*  
336 *parasanguinis* L0020-02, and *S. agalactiae* L0023-01) clustered separately with a  
337 staphylococcal isolate (*S. aureus* L0021-02) for their ability to also form robust biofilms in anoxic  
338 media (Fig. 5A). This contrasts with strains of *S. salivarius* (L0021-01, L0022-03, L0022-04,  
339 L0022-05 and L0022-06) that had a biofilm growth advantage in oxic medium only. The  
340 enhanced biofilm abilities of these isolates correlated well with pH drops below 5 in the culture  
341 broth (Fig. 5B) due to the accumulation of lactate as a fermentation byproduct ( $p=0.03$ ) (Fig.  
342 5C). Culture acidification likely triggered biofilm formation in the streptococcal cultures, because  
343 cells entered stationary phase ( $0.62\pm 0.05$  OD<sub>600</sub>) once the pH dropped below 5. These results  
344 point at lactate accumulation and broth acidification as the trigger of the planktonic-to-biofilm  
345 transition in the otic streptococci. This response is similar to that described for oral streptococcal  
346 commensals, which also produce lactic acid as the main fermentation byproduct (47) and stop  
347 growing once the pH drops to inhibitory levels, usually at or below 5 (48). As a result,  
348 commensal oral streptococci co-aggregate with lactate-utilizing bacteria such as *Veillonella* (49).  
349 The abundance of not only streptococci but also *Veillonella* sequences in otic secretions is  
350 suggestive of similar trophic webs in the middle ear mucosa within microcolonies (5). Such  
351 syntrophic partnerships with *Veillonella*, a strict anaerobe, are especially favored within biofilms.



352 Thus, aggregative streptococci are well suited for biofilm growth in the otic mucosa and for  
 353 syntrophic cooperation with anaerobic partners.

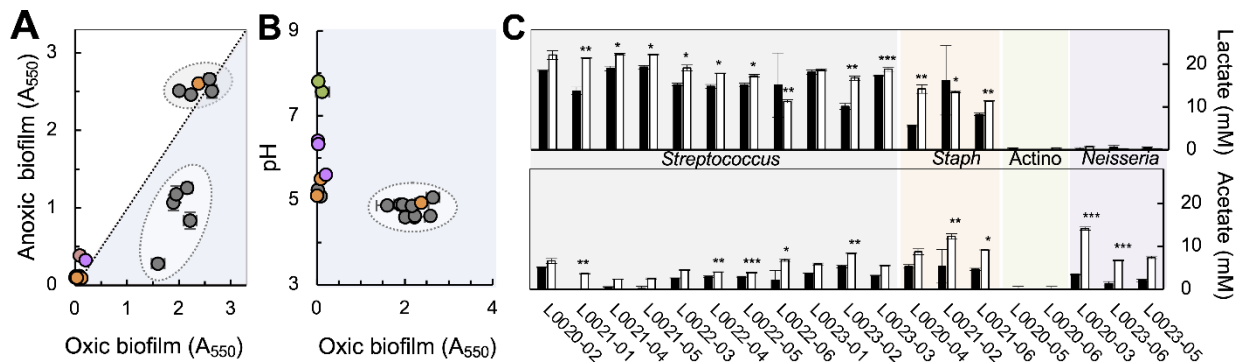

354 **Fig. 5: Adaptive responses promoting the establishment of otic trophic webs.** (A) Biofilm  
 355 biomass (crystal violet staining, measured as absorbance at 550 nm, A<sub>550</sub>) of otic isolates in oxidic  
 356 (blue) and anoxic (white) cultures. The dashed circles identify two separate clusters of isolates  
 357 with highest biofilm-forming abilities. (B) Correlation between biofilm formation and pH in oxidic  
 358 cultures showing . The circle highlights a cluster of strains with highest biofilm-forming activities  
 359 and lowest pH. (C) Lactate and acetate production (mM) in stationary-phase cultures grown in  
 360 oxidic (black) and anoxic (white) media. The asterisks show significant differences between oxidic  
 361 and anoxic values ( $p \leq 0.05$ , \*;  $p \leq 0.01$ , \*\*;  $p \leq 0.001$ , \*\*\*). All data points in A-C are average values  
 362 of three independent biological experiments and are color-coded for *Streptococcus* (gray),  
 363 *Staphylococcus* (orange), *Neisseria* (purple) and actinobacterial genera *Micrococcus* and  
 364 *Corynebacterium* (green).  
 365

### 366 Antagonistic interactions of otic streptococci with common otopathogens

367 Commensal oral streptococci mediate intra- and interspecies antagonistic interactions in oral  
 368 biofilms that are critical to dental and mucosal health (18). Given their oral ancestry, we  
 369 screened the otic streptococci for their ability to inhibit the growth of known otopathogens  
 370 (*Streptococcus pneumoniae*, *Moraxella catharralis*, and non-typeable *Haemophilus influenzae*).  
 371 For these assays, we followed the same protocol as in other plate assays and spot-plated  
 372 overnight cultures on TSA plates before incubating them at 37°C for 24 h to allow the colonies to  
 373 grow. We then covered the plates with a soft (0.7%) agar overlay containing a diluted cell  
 374 suspension of each otopathogen in a growth medium suitable for their growth. After incubation  
 375 of the overlaid plates for an additional 24 h, we examined the overlays for zones of growth  
 376 inhibition on top and around the underlying streptococcal colonies. Growth inhibition in this  
 377 assay may be the result of nutrient competition, secretion of growth inhibitors or both. Fig. 6

378 shows representative plate assays for all the otic strains against each otopathogen. Notably, all  
379 the otic streptococci inhibited the growth of *S. pneumoniae* and *M. catarrhalis*, producing large  
380 zones of clearing beyond the colony edge. The extended region of growth inhibition in the soft-  
381 agar overlay is consistent with the secretion of a diffusible inhibitory compound. We also  
382 observed antagonistic effects against *H. influenzae*, but they were less pronounced and strain-  
383 specific (Fig. 6).

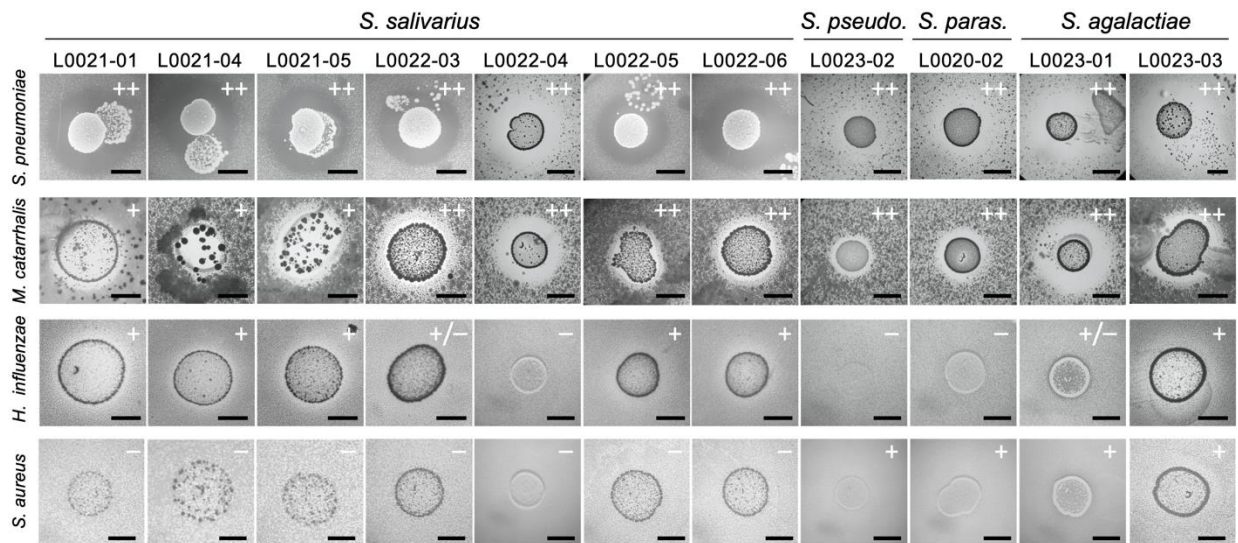

384  
385 **Fig. 6: Growth inhibitory effect of otic streptococci against common otopathogens.** TSA  
386 plates containing 24-h colonies of the otic streptococci were incubated for 24h with soft-agar  
387 overlays of the otopathogens *Streptococcus pneumoniae*, *Moraxella catarrhalis*, *Haemophilus*  
388 *influenzae* and *Staphylococcus aureus*. The plates show clear areas of growth inhibition of the  
389 otopathogen ontop and/or around antagonistic streptococcal colonies underneath (scale bar, 0.5  
390 cm). The symbols indicate average size of the growth inhibition halo around the underlying  
391 streptococcal colony in triplicate plate assays (+, <0.4; ++, >0.4; +/-, ~0.1 but not always  
392 reproducible).

393 We also used the plate assay to screen for potential antagonism of the otic streptococci  
394 towards the nasopharyngeal staphylococci that disperse in the aerodigestive tract. As a test  
395 strain, we used *S. aureus* subsp. *aureus* JE2 (50), a plasmid-cured derivative of the epidemic  
396 community-associated methicillin-resistant *S. aureus* (CA-MRSA) isolate USA300 (51). We  
397 observed antagonism by all the non-salivarius isolates (Fig. 6), suggesting species-specific  
398 mechanism for growth inhibition by these streptococcal groups (*S. pseudopneumoniae*, *S.*

399 *parasanguinis* and *S. agalactiae*). The ability of non-salivarius streptococci to inhibit the growth  
400 of *S. aureus* is not uncommon. Despite being catalase positive, *S. aureus* is sensitive to  
401 hydrogen peroxide produced by *S. pneumoniae* in the nasal mucosa (52). This is because  
402 hydrogen peroxide is converted into a highly toxic hydroxyl radical ( $\cdot\text{OH}$ ) that rapidly kills *S.*  
403 *aureus* (53). The fact that the closest relatives to the non-salivarius otic streptococci all have  
404 catalase-independent mechanisms for anti-oxidative stress resistance (54) and release  
405 hydrogen peroxide as a byproduct of their metabolism (55-57) suggests similar mechanisms for  
406 interspecies interference with *S. aureus*.

## 407 **Discussion**

408 The recovery from otic secretions of close relatives of nasal and oral bacteria (Fig. 2) highlights  
409 the role that saliva aerosols play in the dispersal of bacteria throughout the aerodigestive tract.  
410 Human saliva carries bacteria shed from oral surfaces such as teeth and gums and spreads  
411 them to distant mucosae (58, 59). The constant flux of saliva to the oropharynx (back of the  
412 throat) facilitates the formation of aerosols and their carriage to the middle ear every time the  
413 Eustachian tube opens and exhaled air is drawn in (5). Not surprisingly, phylogenetic analysis of  
414 full-length 16S rRNA sequences recovered from 19 otic cultivars resolved close evolutionary  
415 relationships with species that reside or transiently disperse in the oral cavity (Fig. 2).  
416 Particularly important were the ancestral ties between the otic streptococci, the most prominent  
417 residents of the middle ear communities (5), and pioneer species of oral biofilms (Fig. 2). Most  
418 of the otic streptococci were closely related to *S. salivarius*, one of the first colonizers of the  
419 human oral cavity after birth and an abundant commensal throughout the life of the host (60).  
420 This bacterium disperses in the aerodigestive tract via saliva and forms aggregates that survive  
421 stomach passage (61). This allows Salivarius species to enter the small intestine and colonize  
422 its mucosa (62). The abundance of *S. salivarius* in saliva also increases its dispersal potential in  
423 saliva aerosols, the primary mechanism for seeding of the otic mucosa (5). Aggregation

424 facilitates immunoescape and successful colonization of the otic mucosa. It also promotes  
425 coaggregation with anaerobic syntrophic partners and the formation of otic trophic webs (Fig. 1)  
426 that mirror those described in oral biofilms. Additionally, oral *S. salivarius* strains mediate  
427 antagonistic interactions with virulent streptococci that are critical to prevent tooth decay,  
428 periodontal disease, and the spread of respiratory pathogens such as the otopathogen *S.*  
429 *pneumoniae* (63, 64). We see similar interspecies interference of otic *S. salivarius* strains  
430 towards common otopathogens (Fig. 6), suggesting similar roles for these middle ear residents  
431 in disease prevention.

432         The non-salivarius otic streptococci were also close relatives of oral species (Fig. 2). For  
433 example, one of the isolates (L0020-02) was closely related to *S. parasanguinis*, a bacterium  
434 that groups with species of the Mitis group based on 16S rRNA gene sequence analysis and  
435 shares with them many of their phenotypic characteristics (27). Like *S. salivarius*, *S.*  
436 *parasanguinis* is one of the early colonizers of the oral cavity (18) and disperses in saliva (65). It  
437 produces fimbriae to firmly attach to the biofilms (66), which facilitates its co-dispersal in  
438 syntrophic oral aggregates. Also recovered from otic secretions were strains closely related to  
439 streptococcal commensals such as *S. pseudopneumoniae* (L0023-02; Viridans group) and *S.*  
440 *agalactiae* (L0023-01 and L0023-03; GBS group). Although the oral ancestors of these otic  
441 streptococci have been linked to infective processes in the aerodigestive tract and other body  
442 sites (67, 68), the otic relatives readily inhibited the growth of the three most common  
443 otopathogens (*S. pneumoniae*, *M. catarrhalis*, and non-typeable *H. influenzae*) (Fig. 6).  
444 Furthermore, they were the only otic streptococci that interfered with the growth of *S. aureus*  
445 (Fig. 6). Antagonism towards *S. aureus* may involve the production of hydrogen peroxide as a  
446 metabolic byproduct, as noted for related oral streptococcal species (55-57). Hydrogen peroxide  
447 also functions as a signaling molecule for the co-aggregation of non-salivarius streptococci in  
448 syntrophic biofilms (56). Future studies will need to evaluate the role of these streptococcal

449 lineages in producing hydrogen peroxide as a signal for intra and interspecies co-aggregation  
450 and as an antagonist of bacterial competitors.

451         The results presented in this study identified physiological traits of the otic streptococci  
452 that could facilitate the colonization of the middle ear mucosa and the formation of syntrophic  
453 biofilms. The otic streptococci were temperate swimmers on soft agar plates (Fig. 3), a motile  
454 behavior that could allow them to penetrate the otic mucus layer and reach the underlying  
455 mucosal epithelium. However, not all the isolates secreted surfactants (Table 2). While  
456 endogenous surfactants are often needed for bacteria swarming on semisolid agar surfaces,  
457 they are not always needed for efficient swarming through the native mucus layers (20). This is  
458 particularly true for bacteria colonizing the middle ear mucosa, where host surfactants abound  
459 (69). Furthermore, surfactant production by bacterial colonizers may be undesirable in the otic  
460 mucosa as it would change the rheological properties of the mucus and interfere with critical  
461 mucosal functions such as antimicrobial activity, immunomodulation and Eustachian tube  
462 mechanics (69). The latter is carefully controlled by the secretion of host surfactants that  
463 regulate the viscosity and surface tension of the mucus layer (70). This chemical mechanism  
464 ensures that the surface tension of the mucus is kept sufficiently low (58 mN/m) to facilitate the  
465 rhythmic aperture of the collapsed Eustachian tube and adequate ventilation and  
466 decompression of the tympanic cavity (69). Disruption of surfactant homeostasis increases the  
467 pressure needed to open the Eustachian tube, risking barotrauma and making the middle ear  
468 mucosa more vulnerable to infections (69).

469         An important finding of our study was the identification of similar phenotypic traits among  
470 streptococcal and staphylococcal cultivars recovered from otic secretions that could give them  
471 both a competitive advantage during the colonization of the middle ear mucosa. For example,  
472 the streptococcal and staphylococcal isolates grew optimally with and without oxygen (Fig. 4A)  
473 and secreted mucins and proteases (Table 3), giving them a competitive advantage for growth  
474 and reproduction in the middle ear mucosa. Moreover, both groups had fermentative

475 metabolisms and produced lactate (Fig. 5C), a critical intermediate in the syntrophic otic  
476 communities (5). This contrasts with otic *Neisseria* (L0020-05 and L0020-06) closely related to  
477 *N. flavescens* and *N. subflava*, whose microaerophilic metabolism led to poor growth and  
478 extensive flocculation in oxic broth (Fig. 4A). These two *Neisseria* species form a separate clade  
479 with members of the family Neisseriaceae that populate the tongue dorsum (71) and although  
480 they readily disperse via saliva into the oropharynx (32), they are not positively selected in the  
481 middle ear (5). Furthermore, the *Neisseria* cultivars were along with the two actinobacterial  
482 isolates (*Micrococcus* spp. L0020-05 and *Corynebacterium* spp. L0020-06) the only cultivars  
483 that did not secrete proteases on casein plates (Table 3). Furthermore, they did not form robust  
484 biofilms (Fig. 5A) nor did they produce fermentative byproducts such as lactate (Fig. 5C), a key  
485 metabolic intermediate in the otic trophic webs (Fig. 1). Not surprisingly, despite being the most  
486 abundant nasal phylum (38), actinobacterial sequences are poorly represented in otic  
487 secretions (5).

488         The most notable difference between the staphylococcal and streptococcal isolates was,  
489 however, the co-aggregative behavior of most *Streptococcus*, which is critical for the formation  
490 of microcolonies with anaerobic syntrophic partners (Fig. 1). Aggregative behavior may in fact  
491 be the most successful strategy of oral streptococci during the colonization of the middle ear  
492 mucosa. Most of the streptococcal isolates autoaggregated when growing on agar-solidified  
493 media (Fig. 3B), a phenotype associated with increased resistance to antimicrobials and  
494 immunoescape (72). Aggregation allows oral streptococci to recognize and partner with other  
495 bacteria during the formation of biofilms (49). Thus, streptococci coaggregate with actinomyces  
496 to colonize the tooth surface and recruit other bacteria during the formation of the dental plaque  
497 (18, 73). Metabolic interactions between lactic acid-producing strains of *Streptococcus* and  
498 *Veillonella* spp., which ferment lactate, are critical for coaggregation during the early stages of  
499 biofilm formation on oral surfaces (49). Fusobacteria mediate early coaggregation as well,  
500 forming physical bridges across the biofilms and promoting the attachment of non-

501 coaggregating aerobes and anaerobes (18, 73). These syntrophic interactions sustain the  
502 growth of the dental plaque throughout all dentition stages and the formation of subgingival  
503 biofilms in the predentate and postdentate states (59). The widespread presence and  
504 abundance of syntrophic co-aggregates in the oral cavity promotes their co-dispersal in saliva  
505 (74) and provides a mechanism for their co-immigration in saliva aerosols. These coaggregates  
506 readily establish otic trophic webs (Fig. 1) similar to those described in oral biofilms (5).  
507 Consistent with this, all the streptococcal isolates characterized in this study were highly  
508 aggregative (Fig. 4), formed robust biofilms (Fig. 5A) and produced lactate as primary byproduct  
509 of their fermentative metabolism (Fig. 4C). These adaptive traits allow streptococci to grow and  
510 reproduce in the middle ear mucosa with obligate anaerobic, syntrophic partners such as  
511 *Prevotella*, *Fusobacterium* and *Veillonella* (5). The syntrophic microcolonies metabolize and  
512 ferment host mucins and proteins in the otic mucosa (Fig. 1), indirectly controlling the  
513 viscoelastic properties of the mucus layer and Eustachian tube functionality (69). The detection  
514 of a differential gradient of mucin gene expression along the tympanic cavity and Eustachian  
515 tube (69) suggests a high degree of spatial heterogeneity in bacterial colonization as well.  
516 Shaped like an inverted flask (4), the posterior region of the Eustachian tube is more readily  
517 seeded with saliva aerosols during the cycles of tubal aperture. Concentration of streptococcal  
518 aggregates in this region closer to the nasopharyngeal opening of the Eustachian tube could  
519 provide increased protection against otopathogens, which typically reside in nasal reservoirs.  
520 Future research should therefore consider the mechanisms that allow otic streptococci to co-  
521 aggregate with syntrophic partners, their spatial distribution in the otic mucosa and antagonistic  
522 interactions with transient migrants. This knowledge is important to understand the functionality  
523 of the otic communities and how they influence host functions and the outcome of infections.

## 524 **Methods**

525           **Bacterial strains and culture conditions.** The bacterial strains used in this study  
526 include 19 cultivars isolated from otic secretions (5). Briefly, the samples were collected with a  
527 single swab from the left and right nasopharyngeal openings of the Eustachian tube in 4 young  
528 (19-32 years old), healthy adults recruited as part of a larger study approved by the Michigan  
529 State University Biomedical and Physical Health Review Board (IRB # 17-502). The cultivars  
530 were isolated as single colonies on Tryptic Soy Agar (TSA) plates (30g/L of Tryptic Soy Broth  
531 from Sigma Aldrich and 15g/L of Bacto Agar from BD) grown at 37°C. The isolates were  
532 routinely grown overnight in 5 ml of Tryptic Soy Broth (TSB) at 37°C with gentle agitation. For  
533 growth studies, we transferred mid-log phase ( $OD_{600} \sim 0.5$ ) TSB cultures twice (initial  $OD_{600}$  of  
534 0.1) to prepare a stationary phase ( $\sim 0.9$ - $1.0$   $OD_{600}$ ) inoculum for growth assays in Corning® 96-  
535 well clear round bottom TC-treated microplate (Corning 3799). Growth was initiated with the  
536 addition of 18  $\mu$ l of the inoculum to 162  $\mu$ l of TSB per well and monitored spectrophotometrically  
537 every 30 min ( $OD_{630}$  readings after 0.1 sec of gentle agitation) while incubating the plates at  
538 37°C inside a PowerWave HT (BioTek) plate reader. Each plate contained a well with TSB  
539 medium without cells to use as a blank. Growth in anoxic medium was monitored in a similar  
540 way but in a plate reader housed inside an 855-ABC Portable Anaerobic Chamber (Plas Labs,  
541 Inc.) containing a headspace of  $N_2:CO_2$  (80:20).

542           **DNA sequencing and phylogenetic analyses.** For taxonomic and phylogenetic  
543 analyses, we grew 19 otic isolates (Table 1) in 2 ml of TSB at 37°C for 24 h and harvested the  
544 cells by centrifugation (25,000 x  $g$  for 5 min) in an Eppendorf 5417R refrigerated centrifuge prior  
545 to extracting the genomic DNA with a FastDNA™ Spin kit (MP Biomedicals). Library preparation  
546 with an Illumina Nextera kit and whole genome sequencing in an Illumina NextSeq 550 platform  
547 were at the Microbial Genome Sequencing Center (MiGS; Pittsburgh, PA). We used the FastQC  
548 tool from the Babraham Institute (<https://www.bioinformatics.babraham.ac.uk/projects/fastqc/>)  
549 for sequence quality control and Trimmomatics (75) for cleaning/trimming of the Illumina short



550 reads. After assembling the genomes *de novo* with the Spades assembler (76), we identified the  
551 16S rRNA gene sequences in the contigs with the BAasic Rapid Ribosomal RNA Predictor  
552 (Barnap) (<https://github.com/tseemann/barrnap>). The 16S rRNA gene sequences were  
553 deposited in the GenBank database under individual accession numbers (Table 1). We used the  
554 full-length 16S rRNA sequences to identify the closest species (% identity) in the GenBank  
555 database using the nucleotide Basic Local Alignment Search Tool (BLAST) at the U.S. National  
556 Center of Biological Information (NCBI) using an identity species cutoff value of 98.7% (23). We  
557 retrieved the 16S rRNA gene sequences from the closest type strains listed in the SILVA rRNA  
558 database (<https://www.arb-silva.de>) and aligned them to the otic sequences with the MUSCLE  
559 program in the MEGA X software (77). We used the alignment to build a maximum-likelihood  
560 phylogenetic tree and calculate bootstrap confidence values for each node using 1,000  
561 replications. The tree shows bootstrap values above 50% (78).

562         **Catalase assay.** Frozen stocks of the otic isolates were directly streaked on 1.5% (w/v)  
563 TSA plates to grow individual colonies at 37°C overnight. We spread each colony onto a  
564 microscope slide and added a drop of freshly prepared 3% hydrogen peroxide. Catalase-  
565 positive strains breakdown the hydrogen peroxide into water and oxygen gas, which generates  
566 bubbles. Lack or weak production of bubbles is used to designate a strain as catalase-negative.

567         **Swarming motility and surfactant detection assays.** We screened each otic isolate  
568 for their ability to move on soft (0.5% and, when indicated, 0.4% w/v agar) TSA plates, as a  
569 modification of a previously described assay (79). For these assays, we first grew each isolate  
570 and the positive control (*P. aeruginosa* PA01) in TSB at 37°C overnight (OD<sub>600</sub> ~1) and prepared  
571 a diluted TSB inoculum (OD<sub>600</sub> 0.1). We pipetted a 5- $\mu$ l drop of the diluted culture onto the  
572 surface of the soft agar plates and allowed it to absorb until completely dry (~30 min). We then  
573 incubated the plates at 37°C and photographed the areas of growth at 18, 42 and 62 h against a  
574 ruler using a dissecting scope (Leica MZ6) at a magnification of 0.8X and 1X. The photographs

575 were then analyzed with the ImageJ software (80) to measure the colony diameter over time  
576 and calculate the area expansion (swarming distance) from the initial inoculation spot.

577 We also screened the ability of the otic isolates to produce surfactants with a previously  
578 described atomized oil assay (40). For this, we plated a 5- $\mu$ l drop of the diluted TSB culture  
579 (OD<sub>600</sub> of 0.1) on agar-solidified (1.5% w/v) TSA medium, allowed the inoculum to absorb for  
580 ~30 min, and incubated the plates at 37°C for 24 h. Using an airbrush (type H; Paasche  
581 Airbrush Co., Chicago, IL), we applied a fine mist of mineral oil onto the plate surface.  
582 Surfactant-producing colonies readily display a halo of mineral oil dispersal whose size provides  
583 a semiquantitative measure of surfactant secretion (40). Photography and halo diameter  
584 visualization was as described above for swarming assays, except that we measured the size of  
585 the oil dispersal zone from the colony edge. All strains were tested in three independent  
586 swarming and surfactant assays plates to calculate the average and standard deviation values.

587 **Protease and mucinase plate assays.** We used TSA plates containing 5% lactose-  
588 free, skim milk (Fairlife, LLC) or 0.5% Type II porcine gastric mucin (Sigma Aldrich) to screen  
589 the otic isolates for mucinase and protease secretion, respectively, using *P. aeruginosa* PA01  
590 as a positive control. For these assays, we spot-plated 5  $\mu$ l of overnight TSB cultures and  
591 incubated at 37°C for 24 h, as described earlier for the surfactant assays. Strains that secrete  
592 proteases to the medium degrade the milk's casein and produce a clear halo around the area of  
593 growth after 24 h of incubation. Mucinase producers have zones of mucin lysis around or under  
594 the colony that show as zones of discoloration after staining with 7ml of 0.1% amido black for 30  
595 min and destaining with 14 ml of 2.5 M acetic acid for 30 min. When indicated, plates were  
596 incubated for 48 h to confirm emerging phenotypes. Each strain was tested in triplicate plates  
597 and each was photographed on a lightboard (A4 LED Light Box 9x12 Inch Light Pad, ME456)  
598 with an iPhone 11 at 2.4x magnification.

599           **Organic acid detection in culture supernatant fluids.** We grew triplicate stationary  
600 phase cultures of the otic isolates in oxic and anoxic TSB medium at 37°C and harvested the  
601 culture supernatant fluids by centrifugation (14,000 rpm, 10 min). We measured the pH of the  
602 supernatant fluids (5 ml) with a pH probe (Thermo Scientific™ Orion™ 720A+ benchtop pH  
603 meter) and stored 1 ml of the samples at –20°C for chemical analyses by high performance  
604 liquid chromatography (HPLC). Once thawed, we filter-sterilized 250 µl of the supernatant fluid  
605 into 1-ml HPLC vials and measured their organic acid content in a Shimadzu 20A HPLC  
606 equipped with an Aminex HPX-87H column and a Micro-Guard cation H<sup>+</sup> guard column (Bio-  
607 Rad, Hercules, CA) at 55°C, as previously described (81). As controls, we included samples  
608 with TSB medium and standard solutions of acetate, lactate and pyruvate (provided at 1, 2, 5,  
609 10 and 20 mM concentrations).

610           **Biofilm assays.** We used a previously described assay (82) to test the ability of the otic  
611 cultivars to form biofilms in Corning® 96-well clear round bottom TC-treated microplates  
612 (Corning 3799). We first grew overnight cultures in TSB with gentle agitation (~200 rpm) and  
613 used them to prepare a diluted cell suspension (OD<sub>600</sub> ~0.1) for inoculation (18 µl) into TSB  
614 medium (162 µl per well). Each isolate was tested in 8 replicate wells. After incubating the  
615 plates at 37°C for 24 h, we removed the planktonic culture, washed the wells with ddH<sub>2</sub>O and  
616 stained the surface-attached cells with 0.1% (w/v) crystal violet. We then rinsed the wells with  
617 water and let the stained biofilms to dry overnight at room temperature before solubilizing the  
618 biofilm-associated crystal violet with 180 µl of 30% glacial acetic acid and measured the crystal  
619 violet in the solution spectrophotometrically at 550 nm (82).

620           **Growth inhibition plate assays.** We screened the otic streptococcal isolates for their  
621 ability to inhibit the growth of bacterial species (*S. pneumoniae*, *M. catarrhalis*, and non-typeable  
622 *H influenzae*) commonly associated with infections of the middle ear (83). As test strains, we  
623 used *S. pneumoniae* ATCC 6303 and *M. catarrhalis* ATCC 25238 (from the laboratory strain

624 collection of Dr. Martha Mulks, Department of Microbiology and Molecular Genetics, Michigan  
625 State University) and a non-typeable *H. influenzae* (NTHi) strain isolated by Dr. Poorna  
626 Viswanathan in the teaching lab of the Department of Microbiology and Molecular Genetics  
627 (Michigan State University). The NTHi strain was confirmed prior to experimental use by  
628 multiplex PCR confirmation, as described previously (84). We also included for testing the  
629 laboratory strain *S. aureus* JE2, which was kindly provided by Dr. Neal Hammer (Department of  
630 Microbiology and Molecular Genetics, Michigan State University). The otic streptococci and *S.*  
631 *aureus* JE2 were routinely grown in 5 ml TSB at 37°C with gentle agitation to prepare overnight  
632 cultures for the plate assays. *S. pneumoniae* and *M. catarrhalis* were grown at 37°C overnight in  
633 5 mL of brain heart infusion (BHI) broth (Sigma-Aldrich) without agitation. The NTHi reference  
634 strain of *H. influenzae* was also grown statically at 37°C but in supplemented BHI (sBHI) (85),  
635 which contains (per L): 30 g BHI, 0.01 mg hemin (Bovine, Sigma Aldrich), and 0.002 mg  $\beta$ -  
636 Nicotinamide adenine dinucleotide sodium salt (Sigma Aldrich). All incubations were in a 37°C  
637 incubator with a 5% CO<sub>2</sub> atmosphere except for *S. aureus*, which were in air.

638 We used the spot-on-lawn method (86) to investigate antagonistic interactions between  
639 the otic streptococci and test strains. We first spotted 5  $\mu$ l of a diluted (OD<sub>600</sub> 0.1) overnight  
640 culture of each streptococcal strain onto a 1.5% (w/v agar) TSA plate and allowed it to dry for 30  
641 min at room temperature before incubating at 37°C for 24 h to grow the colonies. We then  
642 overlaid the plates with a warm (55°C) 8-ml layer of soft-agar (0.7%, w/v, final concentration)  
643 medium (TSA, BHI or sBHI) containing the test strain (OD<sub>600</sub> 0.1). The general procedure to  
644 make 0.7% agar overlays was to autoclave 6 ml of 1% agar-solidified growth medium, cool  
645 down the melted agar in a 55°C water bath, add 2 ml of the test strain culture to a final OD<sub>600</sub> of  
646 0.1, and mix by inversion before pouring over the TSA plate surface with the otic colonies. To  
647 make sBHI overlays, we added the chemical supplements to 6 ml of warm (55°C), melted 1%  
648 (w/v) agar BHI before mixing with 2 ml of an overnight NTHi culture to a final OD<sub>600</sub> of 0.1. The  
649 overlays were allowed to solidify at room temperature before incubating for an additional 24 h at

650 37°C in an incubator with or without (*S. aureus* overlay) 5% CO<sub>2</sub>. These culture conditions  
651 promoted the growth of the test strains as a turbid lawn in the overlays after 24 h, except for  
652 areas of growth inhibition (halos or clear zones) on top and around colonies of antagonistic  
653 streptococci growing underneath. At the end of the incubation period, we photographed the  
654 overlaid plates with a dissecting scope (0.63x objective) against a ruler and used the ImageJ  
655 program (4) to measure the size of the growth inhibition zone from the streptococcal colony  
656 edge underneath in triplicate biological replicates.

## 657 **Acknowledgements**

658 The authors would like to thank Dr. Michaela TerAverst and Nicholas Tefft at Michigan State  
659 University for assistance with the HPLC analyses and Drs. Batsirai Mabvakure and Heather  
660 Blankenship at the Michigan Department of Health and Human Services Bureau of Laboratory  
661 for guidance on Illumina short read assembly and contig gene analysis. We are also thankful to  
662 Drs. Martha Mulks, Poorna Viswanathan and Neal Hammer for providing the test strains used in  
663 the growth inhibition plate assays.

## 664 **Funding**

665 This research was funded by grants N00014-17-2678 and N00014-20-1-2471 from the  
666 Microbiome program at the Office of Naval Research (ONR) to GR. KJ acknowledges support  
667 from a summer 2020 G. D. Edith Hsiung and Margaret Everett Kimball Endowed fellowship from  
668 the department of Microbiology and Molecular Genetics at Michigan State University. The  
669 funders had no role in study design, data collection and analysis, decision to publish or  
670 preparation of manuscript.

## 671 **References**

- 672 1. Dewhirst FE, Chen T, Izard J, Paster BJ, Tanner AC, Yu WH, Lakshmanan A, Wade  
673 WG. 2010. The human oral microbiome. *J Bacteriol* 192:5002-17.

- 674 2. Welch JLM, Dewhirst FE, Borisy GG. 2019. Biogeography of the oral microbiome: The  
675 site-specialist hypothesis. *Annu Rev Microbiol* doi:10.1146/annurev-micro-090817-  
676 062503.
- 677 3. Gao L, Xu T, Huang G, Jiang S, Gu Y, Chen F. 2018. Oral microbiomes: more and more  
678 importance in oral cavity and whole body. *Protein Cell* 9:488-500.
- 679 4. Bluestone CD. 2005. *The Eustachian Tube: Structure, function, and role in the middle*  
680 *ear*. BC Decker Inc, Hamilton, Ontario.
- 681 5. Lee J-Y, Jacob KM, Kashefi K, Reguera G. 2021. Oral seeding and niche-adaptation of  
682 middle ear biofilms in health. *Biofilm* 3:100041.
- 683 6. Kandler O. 1983. Carbohydrate metabolism in lactic acid bacteria. *Antonie Van*  
684 *Leeuwenhoek* 49:209-24.
- 685 7. Cotter PD, Hill C. 2003. Surviving the acid test: responses of gram-positive bacteria to  
686 low pH. *Microbiol Mol Biol Rev* 67:429-53.
- 687 8. Delwiche EA, Pestka JJ, Tortorello ML. 1985. The *Veillonellae*: Gram-negative cocci with  
688 a unique physiology. *Annu Rev Microbiol* 39:175-93.
- 689 9. Rios-Covian D, Salazar N, Gueimonde M, de los Reyes-Gavilan CG. 2017. Shaping the  
690 metabolism of intestinal *Bacteroides* population through diet to improve human health.  
691 *Front Microbiol* 8.
- 692 10. Palmer RJ, Diaz PI, Kolenbrander PE. 2006. Rapid succession within the *Veillonella*  
693 population of developing human oral biofilm in situ. *J Bacteriol* 188:4117.
- 694 11. Blaak EE, Canfora EE, Theis S, Frost G, Groen AK, Mithieux G, Nauta A, Scott K, Stahl  
695 B, van Harselaar J, van Tol R, Vaughan EE, Verbeke K. 2020. Short chain fatty acids in  
696 human gut and metabolic health. *Benef Microbes* 11:411-455.
- 697 12. Hall-Stoodley L, Hu FZ, Gieseke A, Nistico L, Nguyen D, Hayes J, Forbes M, Greenberg  
698 DP, Dice B, Burrows A, Wackym PA, Stoodley P, Post JC, Ehrlich GD, Kerschner JE.

- 699 2006. Direct detection of bacterial biofilms on the middle-ear mucosa of children with  
700 chronic otitis media. *JAMA* 296:202-11.
- 701 13. Tonnaer EL, Mylanus EA, Mulder JJ, Curfs JH. 2009. Detection of bacteria in healthy  
702 middle ears during cochlear implantation. *Arch Otolaryngol Head Neck Surg* 135:232-7.
- 703 14. Janssen WJ, Stefanski AL, Bochner BS, Evans CM. 2016. Control of lung defence by  
704 mucins and macrophages: ancient defence mechanisms with modern functions. *Eur*  
705 *Respir J* 48:1201-1214.
- 706 15. Honjo I, Hayashi M, Ito S, Takahashi H. 1985. Pumping and clearance function of the  
707 eustachian tube. *Am J Otolaryngol* 6:241-244.
- 708 16. Sade J. 1971. Mucociliary flow in the middle ear. *Ann Otol Rhinol Laryngol* 80:336-41.
- 709 17. Siegel SJ, Weiser JN. 2015. Mechanisms of bacterial colonization of the respiratory  
710 tract. *Annu Rev Microbiol* 69:425-444.
- 711 18. Kolenbrander PE. 2000. Oral microbial communities: biofilms, interactions, and genetic  
712 systems. *Annu Rev Microbiol* 54:413-37.
- 713 19. Reddy MS, Murphy TF, Faden HS, Bernstein JM. 1997. Middle ear mucin glycoprotein:  
714 Purification and interaction with nontypable *Haemophilus influenzae* and *Moraxella*  
715 *catarrhalis*. *Otolaryngol Head Neck Surg* 116:175-80.
- 716 20. Partridge JD, Harshey RM. 2013. Swarming: Flexible roaming plans. *J Bacteriol*  
717 195:909-918.
- 718 21. Tailford LE, Crost EH, Kavanaugh D, Juge N. 2015. Mucin glycan foraging in the human  
719 gut microbiome. *Front Genet* 6:81.
- 720 22. Bomar L, Brugger SD, Lemon KP. 2018. Bacterial microbiota of the nasal passages  
721 across the span of human life. *Curr Opin Microbiol* 41:8-14.
- 722 23. Stackebrandt E, Ebers J. 2006. Taxonomic parameters revisited: tarnished gold  
723 standards. *Microbiol Today* 33:152–155.

- 724 24. Munoz R, Yarza P, Ludwig W, Euzéby J, Amann R, Schleifer KH, Glockner FO,  
725 Rossello-Mora R. 2011. Release LTPs104 of the All-Species Living Tree. Syst Appl  
726 Microbiol 34:169-70.
- 727 25. Yarza P, Richter M, Peplies J, Euzéby J, Amann R, Schleifer KH, Ludwig W, Glockner  
728 FO, Rossello-Mora R. 2008. The All-Species Living Tree project: A 16S rRNA-based  
729 phylogenetic tree of all sequenced type strains. Syst Appl Microbiol 31:241-250.
- 730 26. Delorme C, Abraham AL, Renault P, Guédon E. 2015. Genomics of *Streptococcus*  
731 *salivarius*, a major human commensal. Infect Genet Evol 33:381-92.
- 732 27. Facklam R. 2002. What happened to the streptococci: Overview of taxonomic and  
733 nomenclature changes. Clin Microbiol Rev 15:613-+.
- 734 28. Huch M, De Bruyne K, Cleenwerck I, Bub A, Cho GS, Watzl B, Snauwaert I, Franz CM,  
735 Vandamme P. 2013. *Streptococcus rubneri* sp. nov., isolated from the human throat. Int  
736 J Syst Evol Microbiol 63:4026-32.
- 737 29. Ohara-Nemoto Y, Haraga H, Kimura S, Nemoto TK. 2008. Occurrence of staphylococci  
738 in the oral cavities of healthy adults and nasal oral trafficking of the bacteria. J Med  
739 Microbiol 57:95-9.
- 740 30. McCormack MG, Smith AJ, Akram AN, Jackson M, Robertson D, Edwards G. 2015.  
741 *Staphylococcus aureus* and the oral cavity: an overlooked source of carriage and  
742 infection? Am J Infect Control 43:35-7.
- 743 31. Knapp JS, Hook EW, 3rd. 1988. Prevalence and persistence of *Neisseria cinerea* and  
744 other *Neisseria* spp. in adults. J Clin Microbiol 26:896-900.
- 745 32. Liu G, Tang CM, Exley RM. 2015. Non-pathogenic *Neisseria*: Members of an abundant,  
746 multi-habitat, diverse genus. Microbiology 161:1297-1312.
- 747 33. Bassis CM, Erb-Downward JR, Dickson RP, Freeman CM, Schmidt TM, Young VB,  
748 Beck JM, Curtis JL, Huffnagle GB. 2015. Analysis of the upper respiratory tract



- 749 microbiotas as the source of the lung and gastric microbiotas in healthy individuals. *mBio*  
750 6:e00037-15.
- 751 34. Kocur M, Kloos WE, Schleifer K-H. 2006. The genus *Micrococcus*, p 961-971. *In*  
752 Dworkin M, Falkow S, Rosenberg E, Schleifer K-H, Stackebrandt E (ed), *The*  
753 *Prokaryotes: Volume 3: Archaea Bacteria: Firmicutes, Actinomycetes* doi:10.1007/0-387-  
754 30743-5\_37. Springer New York, New York, NY.
- 755 35. Zhao G-Z, Li J, Qin S, Zhang Y-Q, Zhu W-Y, Jiang C-L, Xu L-H, Li W-J. 2009.  
756 *Micrococcus yunnanensis* sp. nov., a novel actinobacterium isolated from surface-  
757 sterilized *Polyspora axillaris* roots. *Int J Syst Evol Microbiol* 59:2383-2387.
- 758 36. Kooken JM, Fox KF, Fox A. 2012. Characterization of *Micrococcus* strains isolated from  
759 indoor air. *Mol Cell Probes* 26:1-5.
- 760 37. Brugger SD, Bomar L, Lemon KP. 2016. Commensal–pathogen interactions along the  
761 human nasal passages. *PLOS Pathogens* 12:e1005633.
- 762 38. Koskinen K, Reichert JL, Hoier S, Schachenreiter J, Duller S, Moissl-Eichinger C,  
763 Schopf V. 2018. The nasal microbiome mirrors and potentially shapes olfactory function.  
764 *Sci Rep* 8:1296.
- 765 39. Köhler T, Curty LK, Barja F, van Delden C, Pechère J-C. 2000. Swarming of  
766 *Pseudomonas aeruginosa* is dependent on cell-to-cell signaling and requires flagella  
767 and pili. *J Bacteriol* 182:5990-5996.
- 768 40. Burch AY, Shimada BK, Browne PJ, Lindow SE. 2010. Novel high-throughput detection  
769 method to assess bacterial surfactant production. *Appl Environ Microbiol* 76:5363-72.
- 770 41. Kaito C, Sekimizu K. 2007. Colony spreading in *Staphylococcus aureus*. *J Bacteriol*  
771 189:2553-2557.
- 772 42. Tsompanidou E, Denham EL, Becher D, de Jong A, Buist G, van Oosten M, Manson  
773 WL, Back JW, van Dijk JM, Dreisbach A. 2013. Distinct roles of phenol-soluble modulins

- 774 in spreading of *Staphylococcus aureus* on wet surfaces. Appl Environ Microbiol 79:886-  
775 95.
- 776 43. Pollitt EJJ, Diggle SP. 2017. Defining motility in the *Staphylococci*. Cell Mol Life Sci  
777 74:2943-2958.
- 778 44. Bible AN, Khalsa-Moyers GK, Mukherjee T, Green CS, Mishra P, Purcell A, Aksenova A,  
779 Hurst GB, Alexandre G. 2015. Metabolic adaptations of *Azospirillum brasilense* to  
780 oxygen stress by cell-to-cell clumping and flocculation. Appl Environ Microbiol 81:8346-  
781 57.
- 782 45. Wandersman C. 1989. Secretion, processing and activation of bacterial extracellular  
783 proteases. Mol Microbiol 3:1825-31.
- 784 46. Khan R, Petersen FC, Shekhar S. 2019. Commensal bacteria: An emerging player in  
785 defense against respiratory pathogens. Front Immunol 10.
- 786 47. Smith PA, Sherman JM. 1942. The lactic acid fermentation of streptococci. J Bacteriol  
787 43:725-731.
- 788 48. Sheng J, Marquis RE. 2006. Enhanced acid resistance of oral streptococci at lethal pH  
789 values associated with acid-tolerant catabolism and with ATP synthase activity. FEMS  
790 Microbiology Lett 262:93-98.
- 791 49. Mashima I, Nakazawa F. 2015. Interaction between *Streptococcus* spp. and *Veillonella*  
792 *tobetsuensis* in the early stages of oral biofilm formation. J Bacteriol 197:2104-2111.
- 793 50. Fey PD, Endres JL, Yajjala VK, Widhelm TJ, Boissy RJ, Bose JL, Bayles KW. 2013. A  
794 genetic resource for rapid and comprehensive phenotype screening of nonessential  
795 *Staphylococcus aureus* genes. mBio 4:e00537-12.
- 796 51. Diep BA, Gill SR, Chang RF, Phan TH, Chen JH, Davidson MG, Lin F, Lin J, Carleton  
797 HA, Mongodin EF, Sensabaugh GF, Perdreau-Remington F. 2006. Complete genome  
798 sequence of USA300, an epidemic clone of community-acquired methicillin-resistant  
799 *Staphylococcus aureus*. Lancet 367:731-9.

- 800 52. Regev-Yochay G, Trzcinski K, Thompson CM, Malley R, Lipsitch M. 2006. Interference  
801 between *Streptococcus pneumoniae* and *Staphylococcus aureus*: In vitro hydrogen  
802 peroxide-mediated killing by *Streptococcus pneumoniae*. J Bacteriol 188:4996-5001.
- 803 53. Wu X, Gordon O, Jiang W, Antezana BS, Angulo-Zamudio UA, Del Rio C, Moller A,  
804 Brissac T, Tierney ARP, Warncke K, Orihuela CJ, Read TD, Vidal JE. 2019. Interaction  
805 between *Streptococcus pneumoniae* and *Staphylococcus aureus* generates  $\cdot\text{OH}$  radicals  
806 that rapidly kill *Staphylococcus aureus* strains. J Bacteriol 201.
- 807 54. Chen Z, Wang X, Yang F, Hu Q, Tong H, Dong X. 2017. Molecular insights into  
808 hydrogen peroxide-sensing mechanism of the metalloregulator MntR in controlling  
809 bacterial resistance to oxidative stresses. J Biol Chem 292:5519-5531.
- 810 55. Wilson CB, Weaver WM. 1985. Comparative susceptibility of group B streptococci and  
811 *Staphylococcus aureus* to killing by oxygen metabolites. J Infect Dis 152:323-9.
- 812 56. Duan D, Scofield JA, Zhou X, Wu H. 2016. Fine-tuned production of hydrogen peroxide  
813 promotes biofilm formation of *Streptococcus parasanguinis* by a pathogenic cohabitant  
814 *Aggregatibacter actinomycetemcomitans*. Environ Microbiol 18:4023-4036.
- 815 57. Redanz S, Cheng X, Giacaman RA, Pfeifer CS, Merritt J, Kreth J. 2018. Live and let die:  
816 Hydrogen peroxide production by the commensal flora and its role in maintaining a  
817 symbiotic microbiome. Mol Oral Microbiol 33:337-352.
- 818 58. Crielaard W, Zaura E, Schuller AA, Huse SM, Montijn RC, Keijser BJ. 2011. Exploring  
819 the oral microbiota of children at various developmental stages of their dentition in the  
820 relation to their oral health. BMC Med Genomics 4:22.
- 821 59. Mason MR, Chambers S, Dabdoub SM, Thikkurissy S, Kumar PS. 2018. Characterizing  
822 oral microbial communities across dentition states and colonization niches. Microbiome  
823 6:67.
- 824 60. Kaci G, Goudercourt D, Dennin V, Pot B, Doré J, Ehrlich SD, Renault P, Blottière HM,  
825 Daniel C, Delorme C. 2014. Anti-Inflammatory properties of *Streptococcus salivarius*, a

- 826 commensal bacterium of the oral cavity and digestive tract. *Appl Environ Microbiol*  
827 80:928-934.
- 828 61. Hakalehto E, Vilpponen-Salmela T, Kinnunen K, von Wright A. 2011. Lactic acid bacteria  
829 enriched from human gastric biopsies. *ISRN Gastroenterol* 2011:109183.
- 830 62. Wang M, Ahrné S, Jeppsson B, Molin G. 2005. Comparison of bacterial diversity along  
831 the human intestinal tract by direct cloning and sequencing of 16S rRNA genes. *FEMS*  
832 *Microbiol Ecol* 54:219-31.
- 833 63. Van Hoogmoed CG, Geertsema-doornbusch GI, Teughels W, Quirynen M, Busscher HJ,  
834 Van der Mei HC. 2008. Reduction of periodontal pathogens adhesion by antagonistic  
835 strains. *Oral Microbiol Immunol* 23:43-48.
- 836 64. Van Hoogmoed CG, Geertsema-Doornbusch GI, Teughels W, Quirynen M, Busscher  
837 HJ, Van der Mei HC. 2008. Reduction of periodontal pathogens adhesion by  
838 antagonistic strains. *Oral Microbiol Immunol* 23:43-8.
- 839 65. Wang K, Lu W, Tu Q, Ge Y, He J, Zhou Y, Gou Y, Van Nostrand JD, Qin Y, Li J, Zhou J,  
840 Li Y, Xiao L, Zhou X. 2016. Preliminary analysis of salivary microbiome and their  
841 potential roles in oral lichen planus. *Sci Rep* 6:22943.
- 842 66. Garnett JA, Simpson PJ, Taylor J, Benjamin SV, Tagliaferri C, Cota E, Chen Y-YM, Wu  
843 H, Matthews S. 2012. Structural insight into the role of *Streptococcus parasanguinis*  
844 Fap1 within oral biofilm formation. *Biochem Biophys Res Commun* 417:421-426.
- 845 67. Keith ER, Podmore RG, Anderson TP, Murdoch DR. 2006. Characteristics of  
846 *Streptococcus pseudopneumoniae* isolated from purulent sputum samples. *J Clin*  
847 *Microbiol* 44:923-7.
- 848 68. Raabe VN, Shane AL. 2019. Group B *Streptococcus* (*Streptococcus agalactiae*).  
849 *Microbiol Spectr* 7:10.1128/microbiolspec.GPP3-0007-2018.
- 850 69. McGuire JF. 2002. Surfactant in the middle ear and eustachian tube: a review. *Int J*  
851 *Pediatr Otorhinolaryngol* 66:1-15.

- 852 70. Ghadiali SN, Banks J, Swarts JD. 2002. Effect of surface tension and surfactant  
853 administration on Eustachian tube mechanics. *J Appl Phys* 93:1007-1014.
- 854 71. Donati C, Zolfo M, Albanese D, Tin Truong D, Asnicar F, Iebba V, Cavalieri D, Jousson  
855 O, De Filippo C, Huttenhower C, Segata N. 2016. Uncovering oral *Neisseria* tropism and  
856 persistence using metagenomic sequencing. *Nature Microbiol* 1:16070.
- 857 72. Trunk T, Khalil HS, Leo JC. 2018. Bacterial autoaggregation. *AIMS Microbiol* 4:140-164.
- 858 73. Kriebel K, Hieke C, Müller-Hilke B, Nakata M, Kreikemeyer B. 2018. Oral biofilms from  
859 symbiotic to pathogenic interactions and associated disease –Connection of periodontitis  
860 and rheumatic arthritis by peptidylarginine deiminase. *Front Microbiol* 9.
- 861 74. Belstrom D. 2020. The salivary microbiota in health and disease. *J Oral Microbiol*  
862 12:1723975.
- 863 75. Bolger AM, Lohse M, Usadel B. 2014. Trimmomatic: a flexible trimmer for Illumina  
864 sequence data. *Bioinformatics* 30:2114-20.
- 865 76. Bankevich A, Nurk S, Antipov D, Gurevich AA, Dvorkin M, Kulikov AS, Lesin VM,  
866 Nikolenko SI, Pham S, Prjibelski AD, Pyshkin AV, Sirotkin AV, Vyahhi N, Tesler G,  
867 Alekseyev MA, Pevzner PA. 2012. SPAdes: a new genome assembly algorithm and its  
868 applications to single-cell sequencing. *J Comput Biol* 19:455-477.
- 869 77. Kumar S, Stecher G, Li M, Knyaz C, Tamura K. 2018. MEGA X: Molecular Evolutionary  
870 Genetics Analysis across computing platforms. *Mol Biol Evol* 35:1547-1549.
- 871 78. Hall BG. 2018. Phylogenetic trees made easy: a how-to manual, Fifth edition. ed.  
872 Sinauer Associates is imprint of Oxford University Press, New York.
- 873 79. Quinones B, Dulla G, Lindow SE. 2005. Quorum sensing regulates exopolysaccharide  
874 production, motility, and virulence in *Pseudomonas syringae*. *Mol Plant Microbe Interact*  
875 18:682-93.
- 876 80. Schneider CA, Rasband WS, Eliceiri KW. 2012. NIH Image to ImageJ: 25 years of  
877 image analysis. *Nat Methods* 9:671-5.

- 878 81. Duhl KL, Tefft NM, TerAvest MA. 2018. *Shewanella oneidensis* MR-1 utilizes both  
879 sodium- and proton-pumping NADH dehydrogenases during aerobic growth. Appl  
880 Environ Microbiol 84:e00415-18.
- 881 82. Merritt JH, Kadouri DE, O'Toole GA. 2005. Growing and analyzing static biofilms. Curr  
882 Protoc Microbiol Chapter 1:Unit 1B 1.
- 883 83. Schilder AG, Chonmaitree T, Cripps AW, Rosenfeld RM, Casselbrant ML, Haggard MP,  
884 Venekamp RP. 2016. Otitis media. Nat Rev Dis Primers 2:16063.
- 885 84. World Health O, Centers for Disease C, Prevention. 2011. Laboratory methods for the  
886 diagnosis of meningitis caused by *Neisseria meningitidis*, *Streptococcus pneumoniae*,  
887 and *Haemophilus influenzae*: WHO manual, 2nd ed ed. World Health Organization,  
888 Geneva.
- 889 85. Poje G, Redfield RJ. 2003. General methods for culturing *Haemophilus influenzae*.  
890 Methods Mol Med 71:51-6.
- 891 86. Schillinger U, Lücke FK. 1989. Antibacterial activity of *Lactobacillus sake* isolated from  
892 meat. Appl Environ Microbiol 55:1901-1906.
- 893

894 **Table 1:** Taxonomic classification (reference strain) of otic strains based on the % identity (ID)  
 895 of their full-length 16S rRNA sequence.

| Strain                 | GenBank no. | Reference Strain (Accession; % ID)                             |
|------------------------|-------------|----------------------------------------------------------------|
| <i>Streptococcus</i>   |             |                                                                |
| L0020-02               | MW866489    | <i>Streptococcus parasanguinis</i> (NR_024842.1; 99.47)        |
| L0021-01               | MW866494    | <i>Streptococcus salivarius</i> (NR_042776.1; 99.81)           |
| L0021-04               | MW866496    | <i>Streptococcus salivarius</i> (NR_042776.1; 99.81)           |
| L0021-05               | MW866497    | <i>Streptococcus salivarius</i> (NR_042776.1; 99.81)           |
| L0022-03               | MW866499    | <i>Streptococcus salivarius</i> (NR_042776.1; 99.81)           |
| L0022-04               | MW866500    | <i>Streptococcus salivarius</i> (NR_042776.1; 99.81)           |
| L0022-05               | MW866501    | <i>Streptococcus salivarius</i> (NR_042776.1; 99.81)           |
| L0022-06               | MW866502    | <i>Streptococcus salivarius</i> (NR_042776.1; 99.81)           |
| L0023-01               | MW866503    | <i>Streptococcus agalactiae</i> (NR_040821.1; 100)             |
| L0023-02               | MW866504    | <i>Streptococcus oralis</i> (NR_117719.1; 99.47)               |
| L0023-03               | MW866505    | <i>Streptococcus agalactiae</i> (NR_040821.1; 100)             |
| <i>Staphylococcus</i>  |             |                                                                |
| L0020-04               | MW866491    | <i>Staphylococcus hominis</i> (NR_036956.1; 99.61)             |
| L0021-02               | MW866495    | <i>Staphylococcus aureus</i> (NR_037007.2; 99.87)              |
| L0021-06               | MW866498    | <i>Staphylococcus saccharolyticus</i> (NR_113405.1; 99.4)      |
| <i>Micrococcus</i>     |             |                                                                |
| L0020-05               | MW866492    | <i>Micrococcus luteus</i> (NR_075062.2, 99.61)                 |
| <i>Corynebacterium</i> |             |                                                                |
| L0020-06               | MW866493    | <i>Corynebacterium pseudodiphthericum</i> (NR_042137.1; 99.47) |
| <i>Neisseria</i>       |             |                                                                |
| L0020-03               | MW866490    | <i>Neisseria perflava</i> (NR_114694; 99.93)                   |
| L0023-05               | MW866507    | <i>Neisseria perflava</i> NR_117694.1; 99.74)                  |
| L0023-06               | MW866506    | <i>Neisseria perflava</i> NR_117694.1; 99.74)                  |

896

897 **Table 2. Coaggregation, swarming motility and surfactant production of otic isolates in**  
 898 **reference to positive control (*P. aeruginosa* PA01).**  
 899

| Species/closest relative     | Strain   | Aggregation <sup>a</sup> | Surfactant <sup>b</sup> | Swarming <sup>c</sup> |             |             |
|------------------------------|----------|--------------------------|-------------------------|-----------------------|-------------|-------------|
|                              |          |                          |                         | 18 h                  | 42 h        | 62 h        |
| <i>Streptococcus</i>         |          |                          |                         |                       |             |             |
| <i>S. parasanguinis</i>      | L0020-02 | +                        | –                       | –                     | –           | 0.07 (0.10) |
| <i>S. salivarius</i>         | L0021-01 | +                        | 0.23 (0.19)             | –                     | –           | 0.16 (0.05) |
| <i>S. salivarius</i>         | L0021-04 | +                        | 0.46 (0.09)             | –                     | –           | 0.05 (0.12) |
| <i>S. salivarius</i>         | L0021-05 | +                        | –                       | –                     | –           | 0.05 (0.07) |
| <i>S. salivarius</i>         | L0022-03 | +                        | 0.28 (0.19)             | –                     | –           | 0.19 (0.01) |
| <i>S. salivarius</i>         | L0022-04 | +                        | –                       | –                     | –           | 0.20 (0.08) |
| <i>S. salivarius</i>         | L0022-05 | +                        | 0.18 (0.12)             | –                     | –           | 0.20 (0.03) |
| <i>S. salivarius</i>         | L0022-06 | +                        | 0.09 (0.06)             | –                     | –           | 0.18 (0.02) |
| <i>S. agalactiae</i>         | L0023-01 | +                        | –                       | –                     | 0.21 (0.22) | 0.23 (0.02) |
| <i>S. pseudopneumoniae</i>   | L0023-02 | +                        | –                       | –                     | –           | 0.07 (0.10) |
| <i>S. agalactiae</i>         | L0023-03 | +                        | 0.31 (0.11)             | –                     | 0.19 (0.01) | 0.20 (0.06) |
| <i>Staphylococcus</i>        |          |                          |                         |                       |             |             |
| <i>S. hominis</i>            | L0020-04 | –                        | –                       | –                     | 0.37 (0.01) | 0.63 (0.08) |
| <i>S. aureus</i>             | L0021-02 | –                        | –                       | –                     | 0.53 (0.01) | 0.79 (0.01) |
| <i>S. epidermidis</i>        | L0021-06 | –                        | –                       | –                     | 0.46 (0.03) | 0.64 (0.02) |
| Actinobacteria               |          |                          |                         |                       |             |             |
| <i>M. yunnanensis</i>        | L0020-05 | –                        | 0.86 (0.13)             | –                     | 0.54 (0.05) | 0.75 (0.04) |
| <i>C. pseudodiphthericum</i> | L0020-06 | –                        | 2.64 (0.05)             | –                     | 0.41 (0.06) | 0.72 (0.03) |
| <i>Neisseria</i>             |          |                          |                         |                       |             |             |
| <i>N. perflava</i>           | L0020-03 | –                        | –                       | –                     | 0.44 (0.03) | 0.66 (0.01) |
| <i>N. flavescens</i>         | L0023-05 | +                        | –                       | –                     | –           | 0.23 (0.32) |
| <i>N. flavescens</i>         | L0023-06 | +                        | –                       | –                     | –           | 0.25 (0.35) |
| <i>P. aeruginosa</i>         | PA01     | –                        | 1.37 (0.06)             | 1.24 (0.35)           | 1.58 (0.53) | 2.18 (0.65) |

900 <sup>a</sup> Aggregative (+) or uniform (–) growth of cultures spotted on 0.5% TSA plates.

901 <sup>b</sup> Average (and standard deviation) of triplicate surfactant haloes (cm) measured as the zone of mineral  
 902 oil dispersion around colonies grown at 37°C on 1.5% TSA plates. (–, not detected).

903 <sup>c</sup> Average (and standard deviation) of triplicate swarming expansion zones (cm) around colonies grown at  
 904 37°C on soft agar (0.5%) TSA plates for 18, 42 and 62 h. (–, not detected).

905



906 **Table 3. Protease and mucinase enzymatic activity of otic isolates in reference to positive**  
 907 **control (*P. aeruginosa* PA01).** Presence (+) or absence (–) of a halo of degradation in TSA  
 908 plates supplemented with skim milk (protease assay) or mucin (mucinase assay) after 24 h of  
 909 growth. The presence of a faint halo is indicated with “+/-”.  
 910

| Species/closest relative                  | Strain   | Protease | Mucinase |
|-------------------------------------------|----------|----------|----------|
| <i>Streptococcus</i>                      |          |          |          |
| <i>S. parasanguinis</i>                   | L0020-02 | –        | +        |
| <i>S. salivarius</i>                      | L0021-01 | –        | +/-      |
| <i>S. salivarius</i>                      | L0021-04 | +        | +        |
| <i>S. salivarius</i>                      | L0021-05 | +        | +        |
| <i>S. salivarius</i>                      | L0022-03 | +        | +/-      |
| <i>S. salivarius</i>                      | L0022-04 | +        | +/-      |
| <i>S. salivarius</i>                      | L0022-05 | +        | +        |
| <i>S. salivarius</i>                      | L0022-06 | +        | +        |
| <i>S. agalactiae</i>                      | L0023-01 | +        | +        |
| <i>S. pseudopneumoniae</i>                | L0023-02 | –        | +        |
| <i>S. agalactiae</i>                      | L0023-03 | +        | +        |
| <i>Staphylococcus</i>                     |          |          |          |
| <i>S. hominis</i>                         | L0020-04 | +        | +        |
| <i>S. aureus</i>                          | L0021-02 | +        | +        |
| <i>S. epidermidis</i>                     | L0021-06 | +        | +        |
| Actinobacteria                            |          |          |          |
| <i>Micrococcus yunnanensis</i>            | L0020-05 | –        | +        |
| <i>Corynebacterium pseudodiphthericum</i> | L0020-06 | –        | +        |
| <i>Neisseria</i>                          |          |          |          |
| <i>N. perflava</i>                        | L0020-03 | –        | +        |
| <i>N. flavescens</i>                      | L0023-05 | –        | +        |
| <i>N. flavescens</i>                      | L0023-06 | –        | +        |
| <i>P. aeruginosa</i>                      | PA01     | +        | +        |
